# Supplementary material
Source: PubMed Central journal article supplement (PMC7444276)
Supplement: NIHMS1046293-supplement-Supplementary_material.pdf [file NIHMS1046293-supplement-Supplementary_material.pdf]

**Neuron, Volume 97**

**Supplemental Information**

**SPARK:**

**A US Cohort of 50,000 Families  
to Accelerate Autism Research**

**The SPARK Consortium**

| Name                   | Affiliation                                                         | City         | State |
|------------------------|---------------------------------------------------------------------|--------------|-------|
| Amy M. Daniels         | Simons Foundation                                                   | New York     | NY    |
| LeeAnne G. Snyder      | Simons Foundation                                                   | New York     | NY    |
| Louis F. Reichardt     | Simons Foundation                                                   | New York     | NY    |
| Pamela Feliciano       | Simons Foundation                                                   | New York     | NY    |
| Wendy K. Chung         | Simons Foundation                                                   | New York     | NY    |
| Alexander P. McKenzie  | Kennedy Krieger Institute                                           | Baltimore    | MD    |
| Alexandra N. Stephens  | Simons Foundation                                                   | New York     | NY    |
| Alexies Camba          | University of California, Los Angeles                               | Los Angeles  | CA    |
| Amanda D. Shocklee     | University of Missouri                                              | Columbia     | MO    |
| Amanda G. Gulsrud      | University of California, Los Angeles                               | Los Angeles  | CA    |
| Amy Beaumont           | University of Miami                                                 | Coral Gables | FL    |
| Amy Esler              | University of Minnesota                                             | Minneapolis  | MN    |
| Amy Nicholson          | Vanderbilt University Medical Center                                | Nashville    | TN    |
| Amy Stedman            | Maine Medical Center                                                | Portland     | ME    |
| Amy Swanson            | Vanderbilt University Medical Center                                | Nashville    | TN    |
| Andrea R. Simon        | Baylor College of Medicine                                          | Houston      | TX    |
| Andrew Mason           | Southwest Autism Research and Resource Center                       | Phoenix      | AZ    |
| Angela L. Rachubinski  | University of Colorado, Anschutz Medical Campus                     | Aurora       | CO    |
| Anibal Gutierrez       | University of Miami                                                 | Coral Gables | FL    |
| Anna Marie Paolicelli  | Weill Cornell Medicine                                              | New York     | NY    |
| Barbara Rodriguez      | University of Colorado, Anschutz Medical Campus                     | Aurora       | CO    |
| Beverly E. Robertson   | Simons Foundation                                                   | New York     | NY    |
| Bonnie Van Metre       | Kennedy Krieger Institute                                           | Baltimore    | MD    |
| Brenda Finucane        | Geisinger                                                           | Danville     | PA    |
| Brenda Hauf            | University of North Carolina at Chapel Hill                         | Chapel Hill  | NC    |
| Brian J. O'Roak        | Oregon Health & Science University                                  | Portland     | OR    |
| Brianna M. Vernoia     | Simons Foundation                                                   | New York     | NY    |
| Brittani A. Hilscher   | University of California, Davis                                     | Davis        | CA    |
| Brooke McKenna         | University of Iowa                                                  | Iowa City    | IA    |
| Caitlin Hayes          | Nationwide Children's Hospital                                      | Columbus     | OH    |
| Carrie Thomas          | Cincinnati Children's Hospital Medical Center - Research Foundation | Cincinnati   | OH    |
| Loran Casey White      | Simons Foundation                                                   | New York     | NY    |
| Catherine Bradley      | Medical University of South Carolina                                | Charleston   | SC    |
| Catherine Lord         | Weill Cornell Medicine                                              | New York     | NY    |
| Catherine E. Rice      | Emory University                                                    | Atlanta      | GA    |
| Cesar Ochoa-Lubinoff   | Rush University Medical Center                                      | Chicago      | IL    |
| Cheryl Cohen           | Hugo W. Moser Research Institute at Kennedy Krieger, Inc.           | Baltimore    | MD    |
| Christa Lese Martin    | Geisinger                                                           | Danville     | PA    |
| Christina Harkins      | Cincinnati Children's Hospital Medical Center - Research Foundation | Cincinnati   | OH    |
| Christine Peura        | Maine Medical Center                                                | Portland     | ME    |
| Christopher J. Smith   | Southwest Autism Research and Resource Center                       | Phoenix      | AZ    |
| Cora M. Taylor         | Geisinger                                                           | Danville     | PA    |
| Cordelia R. Rosenberg  | University of Colorado, Anschutz Medical Campus                     | Aurora       | CO    |
| Corrie H. Walston      | University of North Carolina at Chapel Hill                         | Chapel Hill  | NC    |
| Craig A. Erickson      | Cincinnati Children's Hospital Medical Center - Research Foundation | Cincinnati   | OH    |
| Crissy Ortiz           | Medical University of South Carolina                                | Charleston   | SC    |
| Dalia Istephanous      | University of Minnesota                                             | Minneapolis  | MN    |
| Daniel Lee Coury       | Nationwide Children's Hospital                                      | Columbus     | OH    |
| David G. Amaral        | University of California, Davis                                     | Davis        | CA    |
| Deana Li               | University of California, Davis                                     | Davis        | CA    |
| Dustin E. Sarver       | University of Mississippi Medical Center                            | Jackson      | MS    |
| Dzung Cong Nguyen      | University of California, Los Angeles                               | Los Angeles  | CA    |
| Eirene O'Connor        | Simons Foundation                                                   | New York     | NY    |
| Elena Lamarche         | University of North Carolina at Chapel Hill                         | Chapel Hill  | NC    |
| Elizabeth Berry-Kravis | Rush University Medical Center                                      | Chicago      | IL    |
| Emily A. Fox           | University of Washington                                            | Seattle      | WA    |
| Emily Palen            | Geisinger                                                           | Danville     | PA    |
| Emily T. Matthews      | Boston Children's Hospital                                          | Boston       | MA    |
| Eric Courchesne        | University of California San Diego, School of Medicine              | San Diego    | CA    |
| Eric J. Fombonne       | Oregon Health & Science University                                  | Portland     | OR    |

|                        |                                                                           |              |    |
|------------------------|---------------------------------------------------------------------------|--------------|----|
| Eric M. Butter         | Nationwide Children's Hospital                                            | Columbus     | OH |
| Ericka L. Wodka        | Kennedy Krieger Institute and Johns Hopkins School of Medicine            | Baltimore    | MD |
| Eugenia Hofammann      | University of Iowa                                                        | Iowa City    | IA |
| Fiona Miller           | Nationwide Children's Hospital                                            | Columbus     | OH |
| Gabriel S. Dichter     | University of North Carolina at Chapel Hill                               | Chapel Hill  | NC |
| Gabriela Marzano       | Baylor College of Medicine                                                | Houston      | TX |
| Gail Stein             | Children's Hospital of Philadelphia                                       | Philadelphia | PA |
| Hai Li                 | Rush University Medical Center                                            | Chicago      | IL |
| Hana Zaydens           | Simons Foundation                                                         | New York     | NY |
| Hanna Hutter           | Kennedy Krieger Institute                                                 | Baltimore    | MD |
| Hannah E. Kaplan       | University of California San Diego, School of Medicine                    | San Diego    | CA |
| Hoa Lam Schneider      | University of Miami                                                       | Coral Gables | FL |
| Holly Lechniak         | Rush University Medical Center                                            | Chicago      | IL |
| Ivette Arriaga         | University of California, Los Angeles                                     | Los Angeles  | CA |
| Jaclyn Gunderson       | University of Minnesota                                                   | Minneapolis  | MN |
| Jacob J. Michaelson    | University of Iowa                                                        | Iowa City    | IA |
| James S. Sutcliffe     | Vanderbilt University Medical Center                                      | Nashville    | TN |
| James T. McCracken     | University of California, Los Angeles                                     | Los Angeles  | CA |
| Jason Neely            | Kennedy Krieger Institute                                                 | Baltimore    | MD |
| Jeanette M. Cordova    | University of Colorado, Anschutz Medical Campus                           | Aurora       | CO |
| Jennifer A. Gerds      | University of Washington                                                  | Seattle      | WA |
| Jennifer Tjernagel     | Simons Foundation                                                         | New York     | NY |
| Jermel Wallace         | Emory University                                                          | Atlanta      | GA |
| Jessica Orobio         | Baylor College of Medicine                                                | Houston      | TX |
| Jessica Scherr         | Nationwide Children's Hospital                                            | Columbus     | OH |
| Joseph F. Cubells      | Emory University                                                          | Atlanta      | GA |
| Joseph Lillard         | Emory University                                                          | Atlanta      | GA |
| Joseph Piven           | University of North Carolina at Chapel Hill                               | Chapel Hill  | NC |
| Juhi Pandey            | Children's Hospital of Philadelphia                                       | Philadelphia | PA |
| Julie Manoharan        | Simons Foundation                                                         | New York     | NY |
| Kaela O'Brien          | Cincinnati Children's Hospital Medical Center - Research Foundation       | Cincinnati   | OH |
| Kaitlin Smith          | University of Colorado, Anschutz Medical Campus                           | Aurora       | CO |
| Karen L. Pierce        | University of California San Diego, School of Medicine                    | San Diego    | CA |
| Katherine Dent         | Geisinger                                                                 | Danville     | PA |
| Katherine G. Pawlowski | Boston Children's Hospital                                                | Boston       | MA |
| Katherine Roeder       | Emory University                                                          | Atlanta      | GA |
| Kathryn Lowe           | Children's Hospital of Philadelphia                                       | Philadelphia | PA |
| Kathryn A. Schweers    | Rush University Medical Center<br>Boston Children's Hospital - Boston, MA | Chicago      | IL |
| J. Kiely Law           | Hugo W. Moser Research Institute at Kennedy Krieger, Inc.                 | Baltimore    | MD |
| Kira E. Hamer          | University of Washington                                                  | Seattle      | WA |
| Kristen Callahan       | University of Mississippi Medical Center                                  | Jackson      | MS |
| Landon Hosmer-Quint    | Rush University Medical Center                                            | Chicago      | IL |
| Lark Y. Huang-Storms   | Oregon Health & Science University                                        | Portland     | OR |
| Latha V. Soorya        | Rush University Medical Center                                            | Chicago      | IL |
| Laura Carpenter        | Medical University of South Carolina                                      | Charleston   | SC |
| Laura Simon            | University of Minnesota                                                   | Minneapolis  | MN |
| Lauren Kasparson       | Geisinger                                                                 | Danville     | PA |
| Laurie Raymond         | Maine Medical Center                                                      | Portland     | ME |
| Leandra N. Berry       | Nationwide Children's Hospital                                            | Columbus     | OH |
| Leigh A. Coppola       | Oregon Health & Science University                                        | Portland     | OR |
| Leonard J. Abbeduto    | University of California, Davis                                           | Davis        | CA |
| Lillian D. Pacheco     | Oregon Health & Science University                                        | Portland     | OR |
| Lindsey A. Cartner     | Simons Foundation                                                         | New York     | NY |
| Lindsey DeMarco        | Children's Hospital of Philadelphia                                       | Philadelphia | PA |
| Lisa Cordeiro          | University of Colorado, Anschutz Medical Campus                           | Aurora       | CO |
| Lisa M. Prock          | Boston Children's Hospital                                                | Boston       | MA |
| Lorin Higgins          | Nationwide Children's Hospital                                            | Columbus     | OH |
| Lucy Wasserburg        | University of Minnesota                                                   | Minneapolis  | MN |
| Luke P. Grosvenor      | Simons Foundation                                                         | New York     | NY |
| Lynette M. Herbert     | University of Miami                                                       | Coral Gables | FL |

|                         |                                                                                                       |              |    |
|-------------------------|-------------------------------------------------------------------------------------------------------|--------------|----|
| Mark Jones              | Nationwide Children's Hospital                                                                        | Columbus     | OH |
| Mary Hannah Currin      | University of North Carolina at Chapel Hill                                                           | Chapel Hill  | NC |
| Mary Verdi              | Maine Medical Center                                                                                  | Portland     | ME |
| Matthew S. Siegel       | Maine Medical Center                                                                                  | Portland     | ME |
| Maya Lazar              | University of California, Los Angeles                                                                 | Los Angeles  | CA |
| McLeod F. Gwynette      | Medical University of South Carolina                                                                  | Charleston   | SC |
| Meaghan Venezia Parladé | University of Miami                                                                                   | Coral Gables | FL |
| Melissa Brown           | Nationwide Children's Hospital                                                                        | Columbus     | OH |
| Melissa N. Hale         | University of Miami                                                                                   | Coral Gables | FL |
| Meredith Yinger         | Emory University                                                                                      | Atlanta      | GA |
| Michael Alessandri      | University of Miami                                                                                   | Coral Gables | FL |
| Michael J. Morrier      | Emory University                                                                                      | Atlanta      | GA |
| Michelle Jordy          | University of North Carolina at Chapel Hill                                                           | Chapel Hill  | NC |
| Michelle Heyman         | Weill Cornell Medicine                                                                                | New York     | NY |
| Mustafa Sahin           | Boston Children's Hospital                                                                            | Boston       | MA |
| Natalie Pottschmidt     | University of Iowa                                                                                    | Iowa City    | IA |
| Nathan Hanna            | Nationwide Children's Hospital                                                                        | Columbus     | OH |
| Nicole Bardett          | Vanderbilt University Medical Center                                                                  | Nashville    | TN |
| Nicole Russo-Ponsaran   | Rush University Medical Center                                                                        | Chicago      | IL |
| Nicole Takahashi        | University of Missouri                                                                                | Columbia     | MO |
| Nina Harris             | Vanderbilt University Medical Center                                                                  | Nashville    | TN |
| Opal Y. Ousley          | Emory University                                                                                      | Atlanta      | GA |
| A. Pablo Juarez         | Vanderbilt University Medical Center                                                                  | Nashville    | TN |
| Patricia Manning        | Cincinnati Children's Hospital Medical Center - Research Foundation                                   | Cincinnati   | OH |
| Raphael A. Bernier      | University of Washington                                                                              | Seattle      | WA |
| Rebecca J. Landa        | Kennedy Krieger Institute and Johns Hopkins School of Medicine                                        | Baltimore    | MD |
| Renee D. Clark          | University of North Carolina at Chapel Hill                                                           | Chapel Hill  | NC |
| Rick Remington          | Simons Foundation                                                                                     | New York     | NY |
| Robert D. Annett        | University of Mississippi Medical Center                                                              | Jackson      | MS |
| Robert T. Schultz       | Children's Hospital of Philadelphia                                                                   | Philadelphia | PA |
| Robin P. Goin-Kochel    | Baylor College of Medicine                                                                            | Houston      | TX |
| Sabrina White           | University of Mississippi Medical Center                                                              | Jackson      | MS |
| Samantha Plate          | Children's Hospital of Philadelphia                                                                   | Philadelphia | PA |
| Samantha Thompson       | University of California, Davis                                                                       | Davis        | CA |
| Sandra L. Friedman      | University of Colorado, Anschutz Medical Campus                                                       | Aurora       | CO |
| Sara Eldred             | Nationwide Children's Hospital                                                                        | Columbus     | OH |
| Sarah A. Mastel         | Oregon Health & Science University                                                                    | Portland     | OR |
| Sarah Carpenter         | Vanderbilt University Medical Center                                                                  | Nashville    | TN |
| Shanping Qiu            | Weill Cornell Medicine                                                                                | New York     | NY |
| Soo J. Lee              | Rush University Medical Center                                                                        | Chicago      | IL |
| Sophia Sandhu           | University of California, Los Angeles                                                                 | Los Angeles  | CA |
| Stephanie Booker        | Cincinnati Children's Hospital Medical Center - Research Foundation                                   | Cincinnati   | OH |
| Stephanie J. Brewster   | Boston Children's Hospital                                                                            | Boston       | MA |
| Stephen Kanne           | University of Missouri                                                                                | Columbia     | MO |
| Suma Jacob              | University of Minnesota                                                                               | Minneapolis  | MN |
| Sunday Francis          | University of Minnesota                                                                               | Minneapolis  | MN |
| Susan Hepburn           | University of Colorado, Anschutz Medical Campus Current: Colorado State University - Fort Collins, CO | Aurora       | CO |
| Susannah Horner         | Children's Hospital of Philadelphia                                                                   | Philadelphia | PA |
| Vincent J. Myers        | Simons Foundation                                                                                     | New York     | NY |
| Vini Singh              | Kennedy Krieger Institute                                                                             | Baltimore    | MD |
| Wha S. Yang             | University of California, Los Angeles                                                                 | Los Angeles  | CA |
| Zachary Warren          | Vanderbilt University Medical Center                                                                  | Nashville    | TN |
| Ahmad S. Chatha         | Simons Foundation                                                                                     | New York     | NY |
| Alex E. Lash            | Simons Foundation                                                                                     | New York     | NY |
| Alpha Amatya            | Simons Foundation                                                                                     | New York     | NY |
| Andrea J. Ace           | Simons Foundation                                                                                     | New York     | NY |
| Ben Negron              | Tempus Dynamics                                                                                       | Churchville  | MD |
| Chris Rigby             | Simons Foundation                                                                                     | New York     | NY |
| Colleen M. Stock        | Simons Foundation                                                                                     | New York     | NY |
| Curtis Ridenour         | Tempus Dynamics                                                                                       | Churchville  | MD |
